# Supplementary material for: Metabolomics of Plasma in XLH Patients with Arterial Hypertension: New Insights into the Underlying Mechanisms
Source: MDPI journal article supplement (doi:10.3390/ijms25063545), 2024-03-21
Supplement: s1 [file s1]

*Supplementary. There was no correlation observed between acetylcarnitine, pyruvate, butyric acid, or ethanolamine and the levels of PTH, vitamin D, phosphorus, or FGF23. Figure with results of this analysis.*

### FGF-23

**Model Summary**

| Model | R                 | R Square | Adjusted R Square | Std. Error of the Estimate | R Square Change | Change Statistics |     |     |               |
|-------|-------------------|----------|-------------------|----------------------------|-----------------|-------------------|-----|-----|---------------|
|       |                   |          |                   |                            |                 | F Change          | df1 | df2 | Sig. F Change |
| 1     | ,289 <sup>a</sup> | ,083     | ,032              | 244,53518                  | ,083            | 1,635             | 1   | 18  | ,217          |

a. Predictors: (Constant), Acetylcarnitine

**Model Summary**

| Model | R                 | R Square | Adjusted R Square | Std. Error of the Estimate | R Square Change | Change Statistics |     |     |               |
|-------|-------------------|----------|-------------------|----------------------------|-----------------|-------------------|-----|-----|---------------|
|       |                   |          |                   |                            |                 | F Change          | df1 | df2 | Sig. F Change |
| 1     | ,325 <sup>a</sup> | ,106     | ,056              | 241,49939                  | ,106            | 2,132             | 1   | 18  | ,162          |

a. Predictors: (Constant), Pyruvate

**Model Summary**

| Model | R                 | R Square | Adjusted R Square | Std. Error of the Estimate | R Square Change | Change Statistics |     |     |               |
|-------|-------------------|----------|-------------------|----------------------------|-----------------|-------------------|-----|-----|---------------|
|       |                   |          |                   |                            |                 | F Change          | df1 | df2 | Sig. F Change |
| 1     | ,154 <sup>a</sup> | ,024     | -,031             | 252,36417                  | ,024            | ,435              | 1   | 18  | ,518          |

a. Predictors: (Constant), Butyricacid

**Model Summary**

| Model | R                 | R Square | Adjusted R Square | Std. Error of the Estimate | R Square Change | Change Statistics |     |     |               |
|-------|-------------------|----------|-------------------|----------------------------|-----------------|-------------------|-----|-----|---------------|
|       |                   |          |                   |                            |                 | F Change          | df1 | df2 | Sig. F Change |
| 1     | ,160 <sup>a</sup> | ,026     | -,029             | 252,11115                  | ,026            | ,472              | 1   | 18  | ,501          |

a. Predictors: (Constant), Ethanolamine

### Phosphate

### Model Summary

| Model | R                 | R Square | Adjusted R Square | Std. Error of the Estimate | R Square Change | Change Statistics |     |     |               |
|-------|-------------------|----------|-------------------|----------------------------|-----------------|-------------------|-----|-----|---------------|
|       |                   |          |                   |                            |                 | F Change          | df1 | df2 | Sig. F Change |
| 1     | ,559 <sup>a</sup> | ,313     | ,275              | ,42302                     | ,313            | 8,198             | 1   | 18  | ,010          |

a. Predictors: (Constant), Ethanolamine

### Model Summary

| Model | R                 | R Square | Adjusted R Square | Std. Error of the Estimate | R Square Change | Change Statistics |     |     |               |
|-------|-------------------|----------|-------------------|----------------------------|-----------------|-------------------|-----|-----|---------------|
|       |                   |          |                   |                            |                 | F Change          | df1 | df2 | Sig. F Change |
| 1     | ,276 <sup>a</sup> | ,076     | ,025              | ,49053                     | ,076            | 1,483             | 1   | 18  | ,239          |

a. Predictors: (Constant), Butyricacid

### Model Summary

| Model | R                 | R Square | Adjusted R Square | Std. Error of the Estimate | R Square Change | Change Statistics |     |     |               |
|-------|-------------------|----------|-------------------|----------------------------|-----------------|-------------------|-----|-----|---------------|
|       |                   |          |                   |                            |                 | F Change          | df1 | df2 | Sig. F Change |
| 1     | ,232 <sup>a</sup> | ,054     | ,001              | ,49645                     | ,054            | 1,021             | 1   | 18  | ,326          |

a. Predictors: (Constant), Acetylcarnitine

### Model Summary

| Model | R                 | R Square | Adjusted R Square | Std. Error of the Estimate | R Square Change | Change Statistics |     |     |               |
|-------|-------------------|----------|-------------------|----------------------------|-----------------|-------------------|-----|-----|---------------|
|       |                   |          |                   |                            |                 | F Change          | df1 | df2 | Sig. F Change |
| 1     | ,059 <sup>a</sup> | ,003     | -,052             | ,50946                     | ,003            | ,062              | 1   | 18  | ,806          |

a. Predictors: (Constant), Pyruvate

## Vitamin D

### Model Summary

| Model | R                 | R Square | Adjusted R Square | Std. Error of the Estimate | R Square Change | Change Statistics |     |     |               |
|-------|-------------------|----------|-------------------|----------------------------|-----------------|-------------------|-----|-----|---------------|
|       |                   |          |                   |                            |                 | F Change          | df1 | df2 | Sig. F Change |
| 1     | ,149 <sup>a</sup> | ,022     | -,035             | 9,61240                    | ,022            | ,384              | 1   | 17  | ,544          |

a. Predictors: (Constant), Butyricacid

### Model Summary

| Model | R                 | R Square | Adjusted R Square | Std. Error of the Estimate | R Square Change | Change Statistics |     |     |               |
|-------|-------------------|----------|-------------------|----------------------------|-----------------|-------------------|-----|-----|---------------|
|       |                   |          |                   |                            |                 | F Change          | df1 | df2 | Sig. F Change |
| 1     | ,223 <sup>a</sup> | ,050     | -,006             | 9,47491                    | ,050            | ,892              | 1   | 17  | ,358          |

a. Predictors: (Constant), Ethanolamine

### Model Summary

| Model | R                 | R Square | Adjusted R Square | Std. Error of the Estimate | R Square Change | Change Statistics |     |     |               |
|-------|-------------------|----------|-------------------|----------------------------|-----------------|-------------------|-----|-----|---------------|
|       |                   |          |                   |                            |                 | F Change          | df1 | df2 | Sig. F Change |
| 1     | ,263 <sup>a</sup> | ,069     | ,015              | 9,37751                    | ,069            | 1,266             | 1   | 17  | ,276          |

a. Predictors: (Constant), Acetylcarnitine

### Model Summary

| Model | R                 | R Square | Adjusted R Square | Std. Error of the Estimate | R Square Change | Change Statistics |     |     |               |
|-------|-------------------|----------|-------------------|----------------------------|-----------------|-------------------|-----|-----|---------------|
|       |                   |          |                   |                            |                 | F Change          | df1 | df2 | Sig. F Change |
| 1     | ,141 <sup>a</sup> | ,020     | -,038             | 9,62288                    | ,020            | ,346              | 1   | 17  | ,564          |

a. Predictors: (Constant), Pyruvate

PTH

Model Summary

| Model | R                 | R Square | Adjusted R Square | Std. Error of the Estimate | R Square Change | Change Statistics |     |     |               |
|-------|-------------------|----------|-------------------|----------------------------|-----------------|-------------------|-----|-----|---------------|
|       |                   |          |                   |                            |                 | F Change          | df1 | df2 | Sig. F Change |
| 1     | ,072 <sup>a</sup> | ,005     | -,050             | 50,08101                   | ,005            | ,094              | 1   | 18  | ,763          |

a. Predictors: (Constant), Butyricacid

Model Summary

| Model | R                 | R Square | Adjusted R Square | Std. Error of the Estimate | R Square Change | Change Statistics |     |     |               |
|-------|-------------------|----------|-------------------|----------------------------|-----------------|-------------------|-----|-----|---------------|
|       |                   |          |                   |                            |                 | F Change          | df1 | df2 | Sig. F Change |
| 1     | ,349 <sup>a</sup> | ,122     | ,073              | 47,05728                   | ,122            | 2,494             | 1   | 18  | ,132          |

a. Predictors: (Constant), Ethanolamine

Model Summary

| Model | R                 | R Square | Adjusted R Square | Std. Error of the Estimate | R Square Change | Change Statistics |     |     |               |
|-------|-------------------|----------|-------------------|----------------------------|-----------------|-------------------|-----|-----|---------------|
|       |                   |          |                   |                            |                 | F Change          | df1 | df2 | Sig. F Change |
| 1     | ,231 <sup>a</sup> | ,053     | ,001              | 48,85593                   | ,053            | 1,013             | 1   | 18  | ,328          |

a. Predictors: (Constant), Acetilcarnitine

Model Summary

| Model | R                 | R Square | Adjusted R Square | Std. Error of the Estimate | R Square Change | Change Statistics |     |     |               |
|-------|-------------------|----------|-------------------|----------------------------|-----------------|-------------------|-----|-----|---------------|
|       |                   |          |                   |                            |                 | F Change          | df1 | df2 | Sig. F Change |
| 1     | ,069 <sup>a</sup> | ,005     | -,051             | 50,09255                   | ,005            | ,086              | 1   | 18  | ,773          |

a. Predictors: (Constant), Pyruvate
